# Supplementary material for: Genomic innovation of ATD alleviates mistranslation associated with multicellularity in Animalia
Source: eLife. 2020 May 28;9:e58118. doi: 10.7554/eLife.58118 (PMC7302879; doi:10.7554/eLife.58118)
Supplement: Figure 2—source data 1. [file elife-58118-fig2-data1.xlsx]

## Sheet: Fig2A
Substrate: L-Ala-tRNA(Thr)
Time (min)	Buffer			MmThrRS 10 nM			MmATD 1 nM
0	100	100	100	100	100	100	100	100	100
2	95.6082	97.3684	101.086	70.3381	72.031	71.0214	75.4618	71.6599	73.0913
4	96.6887	96.5924	96.2335	56.152	59.9528	61.0451	62.1122	62.2807	62.9454
6	90.7982	92.6451	90.6685	39.9094	49.6289	50.5938	51.8996	52.5304	52.3244
8	93.9003	91.2281	89.5826	25.8975	33.5358	35.5955	41.5127	40.7557	37.6994
10	93.8655	87.6518	91.2114	19.8676	23.3806	23.1761	23.8759	19.1633	20.1561
15	92.5758	90.4184	86.0197	7.59847	11.7746	10.1459	10.2823	12.0445	10.4513

## Sheet: Fig2B
Substrate: L-Thr-tRNA(Thr)
Time (min)	Buffer			MmThrRS 10 nM
0	100	100	100	100	100	100
2	103.69	97.934	90.4044	101.473	97.2884	92.6981
4	100.467	97.561	85.6949	100.554	97.5036	88.2329
6	95.2013	94.7633	85.912	97.6079	95.4376	89.7394
8	98.9644	86.2554	84.9348	96.1785	94.4046	88.3822
10	92.5758	93.6012	87.8393	92.4592	91.4634	90.8388
15	90.9568	87.2453	81.0532	87.6313	87.231	81.5011
