# Supplementary material for: Genomic innovation of ATD alleviates mistranslation associated with multicellularity in Animalia
Source: eLife. 2020 May 28;9:e58118. doi: 10.7554/eLife.58118 (PMC7302879; doi:10.7554/eLife.58118)
Supplement: Figure 3—figure supplement 1—source data 1. [file elife-58118-fig3-figsupp1-data1.xlsx]

## Sheet: F3SF1A
Substrate: L-Ala-tRNA(Thr)
Time (min)	Buffer			EcThrRS 50 nM
0	100	100	100	100	100	100
2	98.0527	95.1949	100.048	11.7201	11.2245	24.6718
4	99.7136	98.1313	91.79	10.9621	4.276	6.51879
6	102.062	100.748	95.5131	14.9854	12.3421	10.2761
8	86.3688	95.6754	80.7637	7.40525	3.207	5.29651
10	88.9462	91.7245	87.2076	6.70554	6.65695	6.92621
15	82.6461	95.8356	75.895	5.65598	8.64917	4.16478

## Sheet: F3SF1B
Substrate: L-Ser-tRNA(Thr)
Time (min)	Buffer			EcThrRS 50 nM
0	100	100	100	100	100	100
2	99.5823	96.9919	93.0836	62.5	32.9669	30.6772
4	94.7047	98.8395	91.902	22.1211	24.1869	6.15274
6	93.5412	96.32	89.6974	14.29	24.1564	6.18156
8	93.8842	90.0901	86.83	17.1688	18.415	5.44669
10	90.2745	90.5329	85.7061	19.6897	20.5069	5.83573
15	85.7995	86.1353	80.1153	22.8073	21.8965	6.08069

## Sheet: F3SF1C
Substrate: L-Thr-tRNA(Thr)
Time (min)	Buffer			EcThrRS 50 nM
0	100	100	100	100	100	100
2	106.562	103.705	98.2785	107.9	98.8522	95.9258
4	107.085	101.47	95.7919	107.022	97.4627	95.6197
6	100.669	99.1341	96.1936	103.323	101.752	97.4177
8	99.2894	98.4897	95.4285	100	102.074	94.7781
10	100.502	97.9058	96.1744	102.069	98.0266	92.9036
15	95.0888	96.5566	91.7559	99.8328	97.3621	90.9334

## Sheet: F3SF1D
Substrtae: L-Ala-tRNA(Thr) + H2O2
Time (min)	Buffer			EcThrRS 50 nM
0	100	100	100	100	100	100
2	94.4805	94.4923	90.6546	89.3287	102.18	94.7028
4	92.3006	91.0499	86.2618	94.062	93.5065	90.6115
6	84.2301	90.0172	75.5383	77.1945	93.8312	84.7545
8	65.0742	81.1102	81.9552	83.5628	79.2208	76.3135
10	81.0297	85.5422	77.9931	75.4303	80.6586	72.6529
15	82.4211	77.7539	77.0456	69.5353	71.243	68.4754

## Sheet: F3SF1E
Substrtae: L-Ser-tRNA(Thr) + H2O2
Time (min)	Buffer			EcThrRS 50 nM
0	100	100	100	100	100	100
2	94.5994	100.816	97.5183	95.2744	98.6192	98.0359
4	91.7523	97.3639	95.5999	93.0584	97.8817	94.8386
6	90.3728	94.3355	92.8593	90.3287	95.3397	92.6462
8	86.4984	91.0246	89.4945	86.6745	92.0603	90.8344
10	83.5192	88.2316	86.8605	83.6953	91.0403	87.637
15	77.781	84.3559	82.7497	80.7455	87.5569	84.9726

## Sheet: F3SF1F
Substrtae: L-Thr-tRNA(Thr) + H2O2
Time (min)	Buffer			EcThrRS 50 nM
0	100	100	100	100	100	100
2	96.1715	98.6885	98.1935	86.8581	95.2785	97.2702
4	91.1651	96.4488	98.7355	89.803	100.363	97.0293
6	89.9871	101.09	95.8852	87.4103	97.1953	95.2027
8	90.0423	100.262	92.3725	85.4224	96.7716	94.3196
10	85.6617	99.6368	90.7868	82.1277	95.0969	96.0257
15	82.9376	94.1081	85.3071	77.4158	92.272	90.827

## Sheet: F3SF2
Aminoacylation by MmThrRS
Time (Min)	-ATP			No H2O2			5 mM H2O2			50 mM H2O2
0	0	0	0	0	0	0	0	0	0	0	0	0
2	1.2	1.03	1.33	46.03	39.39	38.67	39.73	40	40.45	39.11	39.34	34.89
5	1.7	1.96	1.85	42.03	37.62	41.63	40.61	41.04	42.12	44.72	40.08	40.19
10	3.02	2.44	2.63	44.23	42.94	43.12	42.52	42.79	43.9	42.47	40.86	40.57
15	3.91	3.28	3.98	43.51	42.83	43.48	44.73	44.78	46.22	39.96	39.56	39.97

## Sheet: F3SF3A
Substrate: L-Ala-tRNA(Thr)
Time (min)	Buffer			HvATD 500 nM			DrATD 500 nM			GgATD 500 nM			HsATD 50 nM
0	100	100	100	100	100	100	100	100	100	100	100	100	100	100	100
2	95.4087	100.457	98.3085	55.1463	56.9036	67.5622	20.6519	30.75	26.6077	46.8417	37.6944	35.7522	21.3671	21.9242	21.6229
4	98.3855	93.0457	95.3731	26.7407	33.9594	46.2687	5.99942	7.5	7.75811	8.13383	14.8889	17.3451	10.3214	15.102	9.71817
6	98.6882	95.1777	98.0597	23.663	18.2741	20.7463	7.44159	9	8.46608	6.28786	9.83333	12.0944	9.64237	10.1458	10.2041
8	93.2391	95.2284	97.1642	9.48537	13.8579	12.5373	6.74935	6.72222	8.46608	7.8454	5.19444	11.2979	5.6134	6.35569	5.8309
10	91.0192	97.3097	92.7861	5.65086	12.1827	9.85075	5.24949	8.38889	7.40413	5.71099	7.83333	9.02655	6.60933	5.01458	8.79495
15	92.4319	89.6954	85.4726	5.29768	12.7919	6.61691	5.73983	8.13889	7.90561	6.5186	9.02778	9.73451	5.70394	12.3615	6.65695

## Sheet: F3SF3B
Substrate: L-Ala-tRNA(Thr) + H2O2
Time (min)	Buffer			HvATD 500 nM			DrATD 500 nM		GgATD 500 nM			HsATD 50 nM
0	100	100	100	100	100	100	100	100	100	100	100	100	100	100
2	96.7012	99.2176	102.211	46.7955	39.022	47.9607	59.8255	66.5641	56.2734	48.5779	77.8837	52.3191	37.2633	48.5788
4	89.9152	94.2298	93.6609	17.4364	20	20.9828	32.6761	21.2858	24.5746	16.8067	65.3953	27.6902	21.4716	29.199
6	92.6013	91.3447	91.0565	9.51932	11.2958	10.4668	15.5785	13.9034	15.6331	8.72657	58.7819	17.5325	11.2306	16.9681
8	90.2451	88.7531	91.3513	6.36192	8.21516	7.22359	6.59341	6.95171	8.33574	8.40336	49.9846	9.41559	11.2306	12.8768
10	86.1923	89.3888	98.3784	6.78605	7.67726	5.01229	4.62185	7.32082	7.03779	7.98319	42.9099	5.93692	9.38038	9.68992
15	82.9878	85.3301	85.7985	5.89067	5.57457	6.28993	4.29864	6.70563	7.182	8.20944	33.7742	8.30241	6.97074	5.34022
