# Supplementary material for: Genomic innovation of ATD alleviates mistranslation associated with multicellularity in Animalia
Source: eLife. 2020 May 28;9:e58118. doi: 10.7554/eLife.58118 (PMC7302879; doi:10.7554/eLife.58118)
Supplement: Figure 3—source data 1. [file elife-58118-fig3-data1.xlsx]

## Sheet: Fig3A
Substrate: L-Ala-tRNA(Thr)
Time (Min)	Buffer			DrThrRS 50 nM			HsThrRS 50 nM
0	100	100	100	100	100	100	100	100
2	92.2847	92.1399	103.611	21.7068	32.6215	13.1265	47.8687	51.8401
4	96.6752	99.7274	97.7853	14.3184	13.6145	13.5561	25.4049	31.2131
6	89.7698	100.591	101.878	10.3666	1.38815	14.3675	13.3419	20.1272
8	84.4416	98.0918	105.874	17.7549	7.04752	15.6563	15.4732	16.7651
10	87.809	88.7778	96.5816	30.1833	19.7544	18.9021	14.6633	9.85915
15	79.2413	73.6029	96.5335	38.0871	25.1468	17.0406	3.62319	4.08905

## Sheet: Fig 3B
Substrate: L-Ser-tRNA(Thr)
Time (min)	Buffer			HsThrRS 50 nM			MmThrRS 50 nM			DrThrRS 50 nM
0	100	100	100	100	100	100	100	100	100	100	100	100
2	113.081	100.056	96.6395	30.1287	47.2566	12.3266	34.0045	43.8239	35.607	20.7267	27.9826	29.5581
4	116.715	92.9657	94.2085	6.5405	11.1987	4.6475	13.9288	10.2279	9.28071	6.34368	6.35903	6.26341
6	95.5943	91.6291	91.9348	4.52687	4.58638	2.86	5.6321	6.69668	5.84871	2.61923	3.58751	2.6455
8	93.9288	90.8554	90.4619	5.46556	4.16432	4.1756	5.22332	5.83849	4.0755	3.19455	3.30613	4.29
10	95.9728	87.5914	82.6112	7.2218	4.69893	4.6189	6.73732	6.45751	5.64851	3.19455	4.74114	4.147
15	90.2498	81.1621	79.1935	8.99319	4.60045		7.1461	7.21722	7.23581	2.49811	6.57006

## Sheet: Fig 3C
Substarte: L-Thr-tRNA(Thr)
Time (min)	Buffer			HsThrRS 50 nM			MmThrRS 50 nM			DrThrRS 0 nM
0	100	100	100	100	100	100	100	100	100	100	100	100
2	103.69	97.934	90.4044	98.0309	101.334	93.1868	101.473	97.2884	92.6981	92.748	98.7086	99.5183
4	100.467	97.561	85.6949	99.0373	98.4792	91.1645	100.554	97.5036	88.2329	87.8704	99.4754	98.3742
6	95.2013	94.7633	85.912	98.1476	95.825	90.1602	97.6079	95.4376	89.7394	90.7049	99.8789	94.7411
8	98.9644	86.2554	84.9348	98.0018	93.5151	86.4957	96.1785	94.4046	88.3822	95.3985	96.8523	97.4308
10	92.5758	93.6012	87.8393	94.0344	91.9799	87.5136	92.4592	91.4634	90.8388	84.9254	94.1283	96.9691
15	90.9568	87.2453	81.0532	90.213	91.2769	84.2291	87.6313	87.231	81.5011	80.4896	93.3011	91.5295
*This experiment is performed along with figure 2B And henc both the buffers are same.

## Sheet: Fig 3F
Substrate: L-Ala-tRNA(Thr) + H2O2
Time (min)	Buffer			MmThrRS 10 nM			MmATD 1 nM
0	100	100	100	100	100	100	100	100	100
2	95.0875	98.8616	98.8926	98.5868	99.3241	93.6577	69.2463	65.9908	64.2953
4	96.2988	96.407	94.7651	96.3661	99.2885	92.3825	51.2786	57.4884	53.0872
6	92.7658	97.6877	93.8591	97.039	95.5888	92.0805	44.3472	42.8673	45.7047
8	92.362	98.2924	88.5235	96.467	95.5176	90.6376	30.9219	29.8826	32.7852
10	90.4778	94.984	89.3289	93.5734	92.9207	89.4631	19.3472	24.9022	13.7248
15	91.9919	95.1974	86.2081	88.93	93.561	91.8456	10.498	19.3881	7.38255

## Sheet: Fig 3G
Substrate: L-Ala-tRNA(Thr) + H2O2
Time (Min)	Buffer			DrThrRS 50 nM			HsThrRS 50 nM
0	100	100	100	100	100	100	100	100	100
2	84.8653	97.6048	91.8993	99.2598	95.0196	92.6175	87.9863	93.4987	108.21
4	83.7537	90.9752	92.775	96.8035	92.7784	88.5906	84.053	83.4902	106.24
6	77.0842	89.0932	86.3711	91.319	86.8019	82.4832	90.295	85.0299	91.7351
8	78.5806	81.9932	89.272	90.0404	90.3949	85.2349	67.1655	90.2481	93.1034
10	75.0321	79.4269	87.6847	90.9825	87.3355	82.4497	80.9748	57.9555	84.1817
15	99.1449	72.1129	85.3311	90.6797	89.4699	89.1611	63.7879	68.5201	94.636

## Sheet: Fig3H
Substrate: L-Ser-tRNA(Thr) + H2O2
Time (min)	Buffer			HsThrRS 50 nM			MmThrRS 50 nM			DrThrRS 50 nM
0	100	100	100	100	100	100	100	100	100	100	100	100
2	93.2641	95.7247	93.5771	90.2738	86.6883	95.3118	91.2339	94.9636	92.4051	101.117	95.8219	95.9369
4	94.4287	95.3522	93.0458	83.3176	81.6194	89.0139	89.2036	90.8988	89.9203	94.6333	92.7611	91.233
6	87.9761	91.2551	88.1856	78.8952	69.4413	81.1689	85.458	91.7247	92.5301	83.1287	87.6761	89.9047
8	87.5197	89.1174	85.4665	72.7416	68.4373	76.4651	84.3248	83.579	84.3882	79.3831	83.579	68.9483
10	83.4278	81.5547	85.4665	63.3145	67.4008	73.324	79.0211	80.4049	77.9809	66.9185	78.0405	78.9811
15	78.9109	77.83	76.2619	67.7998	58.7854	67.6043	74.4256	67.8705	69.6984	67.2962	71.0283	74.1835

## Sheet: Fig 3I
L-Thr-tRNA(Thr) + H2O2
Time (min)	Buffer			HsThrRS 50 nM			MmThrRS 50 nM			DrThrRS 50 nM
0	100	100	100	100	100	100	100	100	100	100	100	100
2	99.2047	97.3429	95.594	102.401	99.2268	99.8992	107.703	98.2286	99.3233	104.096	100.604	97.2839
4	102.842	96.5134	98.3441	100.928	98.8753	99.2945	98.9544	98.0318	98.2433	107.21	102.235	100.153
6	96.4801	93.3924	100.374	100.648	98.327	96.9474	98.3211	98.2567	96.933	103.866	99.416	103.73
8	93.8439	97.5116	93.2469	95.8026	91.9584	97.581	102.577	96.0073	94.3701	104.117	100.101	100.363
10	99.3815	93.4205	90.4248	95.4934	90.6509	95.4356	99.9264	95.8246	94.1541	104.159	98.7112	92.2724
15	94.4183	92.1833	87.2282	94.271	90.1167	86.7099	94.2563	87.9376	92.023	98.4953	95.0262	86.2089
