# Supplementary material for: Genomic innovation of ATD alleviates mistranslation associated with multicellularity in Animalia
Source: eLife. 2020 May 28;9:e58118. doi: 10.7554/eLife.58118 (PMC7302879; doi:10.7554/eLife.58118)
Supplement: Figure 4—source data 1. [file elife-58118-fig4-data1.xlsx]

## Sheet: Fig 4D
Substrate: L-Ala-tRNA(Thr)
Time (min)	Buffer			MmATD-G115F 500 nM			MmATD-G115F 5 uM
0	100	100	100	100	100	100	100	100	100
2	102.645	86.5242	102.799	98.2824	89.9009	100.097	108.176	87.9182	89.8327
4	96.3586	91.9765	101.641	95.3968	90.9851	94.6268	90.5187	83.4882	90.2831
6	98.145	88.5688	96.3964	88.8698	91.6667	90.1866	79.0794	81.3507	85.2638
8	98.6603	83.829	92.4067	83.8543	80.0805	82.4324	79.8351	76.1772	81.1133
10	90.9653	80.0496	87.9987	79.4916	63.7546	83.7194	70.0103	68.0297	70.1094
15	84.8162	77.4783	86.3578	68.5332	53.2528	71.7503	61.8001	61.8649	56.6281
