# Supplementary material for: Genomic innovation of ATD alleviates mistranslation associated with multicellularity in Animalia
Source: eLife. 2020 May 28;9:e58118. doi: 10.7554/eLife.58118 (PMC7302879; doi:10.7554/eLife.58118)
Supplement: Figure 5—source data 1. [file elife-58118-fig5-data1.xlsx]

## Sheet: Fig 5G
Substrate: L-Ser-tRNA(Thr)
Time (min)	Buffer			MmATD 5 nM			MmATD 50 nM			MmATD 500 nM
0	100	100	100	100	100	100	100	100	100	100	100	100
2	98.9765	95.1546	94.7368	89.5764	89.8756	85.2149	36.5297	26.0431	31.4124	27.4602	27.7752	33.1286
4	97.3233	94.2189	93.5439	86.1754	89.8284	85.955	21.0676	16.5958	17.8869	12.5649	12.3603	10.8959
6	96.8981	91.6625		76.7596	73.2798	78.8852	19.0679	9.35286	10.8015	4.53472	6.37695	7.73107
8	97.5594	90.944	80.5263	83.7663	86.1124	82.8374	9.11667	5.74713	8.88049	1.14942	2.22012	3.96788
10	95.7802	87.8864	79.9474	76.0195	75.185	79.8142	1.65328	3.33806	5.16454	2.34609	3.08613	2.26736
15	90.4582	78.1955	74.5965	63.2971	64.8874	67.2178	1.32263	1.48008	2.23587	1.08644	1.29113	1.0707

## Sheet: Fig 5H
Substrate: L-Ser-tRNA(Thr)
Time (min)	Buffer			EF-Tu			MmATD 500 nM			MmATD 500 nM + EF-Tu
0	100	100	100	100	100	100	100	100	100	100	100	100
2	95.8755	88.0146	100	95.265	95.5752	78.6811	34.3734	36.5525	27.7618	78.6927	71.5852	97.8133
5	96.1733	94.1324	96.4589	94.4461	92.1316	82.5266	17.6084	26.8757	17.8782	76.6379	60.3309	96.7526
10	88.9369	91.7661	91.7591	94.0738	91.3813	78.563	6.18991	23.7591	7.70788	76.6528	56.7911	96.0672
