# Supplementary material for: Genomic innovation of ATD alleviates mistranslation associated with multicellularity in Animalia
Source: eLife. 2020 May 28;9:e58118. doi: 10.7554/eLife.58118 (PMC7302879; doi:10.7554/eLife.58118)
Supplement: Figure 6—source data 1. [file elife-58118-fig6-data1.xlsx]

## Sheet: Fig6C
Substrate: L-Ala-tRNA(Thr)
Time (min)	Buffer			SrATD 50 nM			SrATD 500 nM
0	100	100	100	100	100	100	100	100	100
2	100.115	99.8413	97.3067	68.2547	79.1204	70.8297	24.8282	15.348	19.722
4	97.8012	99.6826	93.9835	58.8869	69.9841	62.6195	4.55795	5.37293	4.51781
6	96.1979	99.2519	94.331	48.7174	62.2535	54.0617	3.29821	2.33507	3.27976
8	96.2208	100.453	92.159	41.9148	55.1122	47.98	2.45076	2.06302	2.80191
10	93.9304	96.6901	91.8332	39.7389	44.2303	45.1564	2.65689	2.33507	3.67072
15	90.5863	90.9998	87.424	28.2868	34.5953	35.9904	3.57307	4.3981	3.73588

## Sheet: Fig6D
Substrate: L-Ala-tRNA(Ala)
Time(min)	Buffer			SrATD 500 nM			SrATD 50 nM
0	100	100	100	100	100	100	100	100	100
2	102.897	99.6391	97.3493	79.4712	75.7075	83.316	95.626	99.8101	94.3001
4	96.2675	97.7018	88.4789	66.3103	56.6002	63.2883	94.5373	96.2203	96.6389
6	94.965	96.8091	85.2911	55.0739	42.83	50.8316	86.4308	94.397	91.2509
8	93.0599	93.4473	88.5655	43.2154	34.7199	38.4096	88.958	90.2944	88.3576
10	91.2908	91.6809	84.6674	40.1827	27.6733	33.5586	84.9534	86.3248	84.2862
15	83.5342	86.1539	81.7568	30.8126	22.3362	22.7477	80.1322	80.5508	75.5544
